# Supplementary material for: Multiplex Mediator Displacement Loop-Mediated Isothermal Amplification for Detection of Treponema pallidum and Haemophilus ducreyi
Source: PubMed Central journal article supplement (PMC6986840; doi:10.3201/eid2602.190505), 2020-02
Supplement: 19-0505-Techapp-s1.pdf [file 19-0505-Techapp-s1.pdf]

# Multiplex Mediator Displacement Loop-Mediated Isothermal Amplification for Detection of *Treponema pallidum* and *Haemophilus ducreyi*

## Appendix

### Assay Optimization

#### Oligonucleotide and Primer Design

For the *Treponema pallidum* and *Haemophilus ducreyi* loop-mediated isothermal amplification (TPHD-LAMP) assay, we redesigned and further optimized oligonucleotides previously described by Knauf et al. (1) for detecting *T. pallidum* and by Becherer et al. (2) for detecting *H. ducreyi* to improve assay performance. In brief, we designed primers from GenBank sequences of the 16S ribosomal RNA gene of *H. ducreyi* and the *polA* gene of *T. pallidum* using PrimerExplorer V5 (Fujitsu, <http://primerexplorer.jp>) software.

Mediator displacement (MD) LAMP (2) for the simultaneous detection of multiple targets requires MD probes and fluorogenic universal reporter (UR) molecules for signal generation. An MD probe is comprised of a universal mediator (Med) combined with a modified Loop F (LF) or Loop B (LB) primer. The modified primer (LB/LF\_Medc) contains target-specific primer sequences (LF or LB) at the 3'-end and a universal sequence at the 5'-end (Medc) that is complementary to the mediator. We designed MD probes in silico with Visual OMP version 7.8.42.0 (DNA Software, <https://www.dnasoftware.com>) software, as described previously (2), and used URs described by Lehnert et al. (4) and Becherer et al. (2). Oligonucleotides were synthesized and cartridge purified by Biomers (<https://www.biomers.net>) (Appendix Table 1).

## LAMP Primer Sets

The MD LAMP included 6 primers per target, as described by Nagamine et al. (5), and an MD probe comprised of LB\_Medc or LF\_Medc, a Med, and a UR (2). We list oligonucleotides and UR sequences in Appendix Table 1. Standard concentration (1×) of primers, Med probes, and UR for TPHD-LAMP is 1.6 μmol/L of each forward inner primer (FIP) and backward inner primer (BIP), 0.6 μmol/L LF and 0.2 μmol/L LF\_Medc, or 0.6 μmol/L LB and 0.2 μmol/L LB\_Medc, 0.2 μmol/L of each F3 and B3, 0.1 μmol/L Med, and 0.05 μmol of UR. We used the same 6-primer set for singleplex LAMP assays, which contained 1.6 μmol/L of each FIP and BIP, 0.8 μmol/L of each LF and LB, and 0.2 μmol/L of each F3 and B3. We performed the singleplex LAMP assays using the intercalating dye SYBR green.

## Primer Titration for TPHD-LAMP

To simultaneously amplify 2 targets in 1 reaction vessel successfully, both primer sets must perform equally. In a biplex LAMP reaction with an unbalanced assay, the more efficient assay will inhibit the amplification of the second target partially by binding the polymerase to the amplicon (3). Experiments using the standard 1× concentration of primers, mediator, and UR showed that the amplification of *H. ducreyi* is faster than the amplification of *T. pallidum* (data not shown). Consequently, the assay efficiency for *H. ducreyi* amplification is higher and might influence the amplification of *T. pallidum*. We also performed target titration and found that low *T. pallidum* concentrations,  $3 \times 10^3$  copies/reaction, combined with high *H. ducreyi* concentrations,  $3 \times 10^5$  copies/reaction, led to false-negative signals for *T. pallidum* (Appendix Table 2).

To solve this problem, we optimized the primer, Med, and UR concentrations used in TPHD-LAMP to focus on sensitivity and time to positive ( $t_p$ ) and increase the support of the amplification of *T. pallidum*. We increased the concentration of primers, Med, and UR of the *T. pallidum* component to 1.25× and 1.5× and left the concentrations for the *H. ducreyi* component at the standard 1× concentration per reaction. Both concentrations for *T. pallidum* component showed better results; the concentration of 1.25× demonstrated best results and  $t_p$ . When we combined  $3 \times 10^3$  copies/reaction of *T. pallidum* with  $3 \times 10^5$  copies/reaction of *H. ducreyi*, we could still detect positive signals for both targets (data not shown). We fixed 1.25× concentration for *T. pallidum* component and 1× concentration for *H. ducreyi* component of the TPHD LAMP and used these for the subsequent testing of clinical samples (Appendix Table 3).

## Plasmid Design

To determine analytical performance parameters of the assay and primer optimization, we obtained plasmid targets from Eurofins Scientific (<https://www.eurofins.com>) to use as quantified standard. Plasmids contained 300 bp of a defined conserved region of the 16S gene for *H. ducreyi* and the *polA* gene for *T. pallidum*. We diluted plasmid DNA in 10 mM Tris (pH 8) to adjust concentrations.

## Clinical Performance of the TPHD-LAMP

### Reference Assays

We performed a TaqMan real-time PCR targeting a 67-bp fragment of the *T. pallidum* polymerase I (*polA*) gene using previously described primers and probes (7). We used a plasmid containing the amplified fragment of the *polA* gene as a quantification standard covering the range  $10^1$ – $10^6$  gene copies, but modified the reaction mix. In brief, the reaction encompassed 10  $\mu$ L TaqMan Universal Master Mix II without Uracil-N glycosylase (Applied Biosystems, <https://www.thermofisher.com>) and 1.8  $\mu$ L each of 10  $\mu$ mol/L primer and the hydrolysis probe. We completed the reaction with 1  $\mu$ L of the genomic DNA sample, independent of the DNA concentration. We used molecular-grade water to adjust the reaction volume to 20  $\mu$ L and used the following cycling conditions: 50°C for 2 m, 95°C for 10 m, then 40 cycles each at 95°C for 15 s and 60°C for 60 s.

We retrieved ortholog sequence data of the *Haemophilus* 16S rRNA gene from GenBank (Appendix Figure 1, Appendix Table 4) and aligned the genes by using Geneious R11 (<https://www.geneious.com>). We used V-Xtractor (<http://www.cmde.science.ubc.ca/mohn/software.html>), a Perl-based high-throughput software tool, to locate the hypervariable regions of the 16S rRNA sequences using the Hidden Markov Models option. In silico, we searched for regions that discriminate *H. ducreyi* from ortholog 16S rRNA gene sequences. We found suitable target sequences in the V8 region of the 16S rRNA gene and designed primers to target that region. Prior to use in the qPCR, we ran a PCR using the newly designed sense primer 5'-TAT ACA GAG GGC GGC AAA CC and the antisense primer 5'-CCA ATC CGG ACT TAG ACG TAC. Sanger sequencing of the 66-bp product confirmed the amplification of the targeted sequence of the 16S rRNA gene of *H. ducreyi*. We cloned the

product and used it to generate a plasmid quantification standard for the qPCR covering a  $10^1$ – $10^6$  gene copies. Subsequently, we designed a hydrolysis probe FAM-5' CAA AGG GGA GCG AAT CTC AC-TAMRA and used it to perform the TaqMan qPCR using the same reaction mix and cycling conditions as described for the *polA* qPCR.

LAMP and qPCR assays used the same DNA extracts and included appropriate negative controls. Because of sample restrictions, we analyzed samples as duplicates. All reactions of the *polA* and *H. ducreyi* qPCR were run on a StepOnePlus Real-Time PCR System (Applied Biosystems). We analyzed raw data by using the StepOne Software version 2.3 (Life Technologies, <https://www.thermofisher.com>). We considered positive reactions to be those with exponential increase of delta-Rn, a value that corresponds to the intensity of fluorescence. We excluded samples that increased in fluorescence above the threshold but failed exponential increase.

#### **Validation of TPHD-LAMP in Clinical Samples**

To validate the TPHD-LAMP, we used clinical samples to determine the sensitivity and specificity for *T. pallidum* and *H. ducreyi*, which we calculated by using the following formulas:

$$\% \text{ Sensitivity} = \frac{TP}{TP+FN} \times 100$$

$$\% \text{ Specificity} = \frac{TN}{TN+FP} \times 100$$

$$\text{Positive predictive value (\%)} = \frac{TP}{TP+FP} \times 100$$

$$\text{Negative predictive value (\%)} = \frac{TN}{TN+FN} \times 100$$

where TP (true positive) means positive results were confirmed with PCR; TN (true negative) means negative results were confirmed with PCR; FP (false positive) means PCR results were negative; and FN (false negative) means PCR results were positive. We calculated positive predictive values and negative predictive values for TP, TN, FP, and FN of TPHD-LAMP of clinical samples (Appendix Table 5) and for singleplex LAMP assays of clinical samples (Appendix Table 6).

## Assessment of Analytical Performance

### Analytical Sensitivity and Specificity

We described how we calculated values for the limit of detection (LOD) of the TPHD-LAMP in the main article (Appendix Figure 2). We determined the linearity of the bplex assays, containing both targets, was  $R^2(H. ducreyi) = 0.97$  and  $R^2(T. pallidum) = 0.95$ .

We generated analytical specificity data by in silico analysis. Then we tested a panel including *Escherichia coli*, *Klebsiella pneumoniae*, *Acinetobacter baumannii*, *Pseudomonas aeruginosa*, *Enterobacter cloacae*, *Salmonella enterica* (Paratyphi and Typhi), *Streptococcus pneumoniae*, *Streptococcus pyogenes*, *Staphylococcus aureus*, *Corynebacterium diphtheria*, *Corynebacterium ulcerans*, *Proteus mirabilis*, and *Enterococcus faecalis*. We tested the specificity of primer sets for the single *T. pallidum* and *H. ducreyi* components of the TPHD-LAMP, and for TPHD-LAMP assay. In all cases, assays were negative within 60 m for single components (data not shown) and for TPHD-LAMP (Appendix Figure 3), demonstrating high analytical specificity.

### Interassay and Intraassay Variability

Interassay variability describes reproducibility and intraassay variability describes repeatability of assays. We calculated interassay and intraassay variability of the TPHD-LAMP assay by using 3 batches of bplex LAMP mix, individually prepared on 3 separate days, processed in different runs, and ran each batch in 3 replicates. First, we evaluated TPHD-LAMP assays that contained  $3 \times 10^4$  copies/reaction of a single target; then we tested them for simultaneous detection of both targets in the sample. We determined  $t_p$  as the time of the maximum increase of fluorescence, calculated by the first derivative of the fluorescence intensity, as previously described (2,6). We calculated the SD for  $t_p$  by the scattering of measurement values between triplicates.

For assays containing a single target, the TPHD-LAMP interassay coefficients of variation (CVs) were 0.9 % for *H. ducreyi* and 2.6 % for *T. pallidum*. The intraassay CVs were 0 for *H. ducreyi* and 3.5 % for *T. pallidum*. For assays containing both pathogens, the interassay CVs were 0.2 % for *H. ducreyi* and 2.8 % for *T. pallidum* and the intraassay CVs were 0.5 % for *H. ducreyi* and 2.0 % for *T. pallidum*. The  $t_p$  for *H. ducreyi* were almost constant around 7 m

independent of the presence of *T. pallidum* (Appendix Figure 4). In contrast,  $t_p$  for *T. pallidum* increased from 11.4 m  $\pm$  0.4 m in assays without *H. ducreyi* to 30.4 m  $\pm$  0.8 m for TPHD-LAMP in assays containing both targets.

## References

1. Knauf S, Lüert S, Šmajš D, Strouhal M, Chuma IS, Frischmann S, et al. Gene target selection for loop-mediated isothermal amplification for rapid discrimination of *Treponema pallidum* subspecies. PLoS Negl Trop Dis. 2018;12:e0006396. [PubMed https://doi.org/10.1371/journal.pntd.0006396](https://doi.org/10.1371/journal.pntd.0006396)
2. Becherer L, Bakheit M, Frischmann S, Stinco S, Borst N, Zengerle R, et al. Simplified real-time multiplex detection of loop-mediated isothermal amplification using novel mediator displacement probes with universal reporters. Anal Chem. 2018;90:4741–8. [PubMed https://doi.org/10.1021/acs.analchem.7b05371](https://doi.org/10.1021/acs.analchem.7b05371)
3. SantaLucia J Jr. Physical principles and visual-OMP software for optimal PCR design. Methods Mol Biol. 2007;402:33–4. [PubMed https://doi.org/10.1007/978-1-59745-528-2\\_1](https://doi.org/10.1007/978-1-59745-528-2_1)
4. Lehnert M, Kipf E, Schlenker F, Borst N, Zengerle R, von Stetten F. Fluorescence signal-to-noise optimisation for real-time PCR using universal reporter oligonucleotides. Anal Methods. 2018;10:3444–54. <https://doi.org/10.1039/C8AY00812D>
5. Nagamine K, Hase T, Notomi T. Accelerated reaction by loop-mediated isothermal amplification using loop primers. Mol Cell Probes. 2002;16:223–9. [PubMed https://doi.org/10.1006/mcpr.2002.0415](https://doi.org/10.1006/mcpr.2002.0415)
6. Martineau RL, Murray SA, Ci S, Gao W, Chao S-H, Meldrum DR. Improved performance of loop-mediated isothermal amplification assays via swarm priming. Anal Chem. 2017;89:625–32. [PubMed https://doi.org/10.1021/acs.analchem.6b02578](https://doi.org/10.1021/acs.analchem.6b02578)
7. Chen C-Y, Chi K-H, George RW, Cox DL, Srivastava A, Rui Silva M, et al. Diagnosis of gastric syphilis by direct immunofluorescence staining and real-time PCR testing. J Clin Microbiol. 2006;44:3452–6. [PubMed https://doi.org/10.1128/JCM.00721-06](https://doi.org/10.1128/JCM.00721-06)

**Appendix Table 1.** Sequences of primers, mediator displacement probes, and universal reporters for loop-mediated isothermal amplification for *Treponema pallidum* and *Haemophilus ducreyi*\*

| Target, description        | Sequence, 5'→3'                                                             | Reference |
|----------------------------|-----------------------------------------------------------------------------|-----------|
| <i>Haemophilus ducreyi</i> |                                                                             |           |
| F3                         | ATGTTGGGTTAAGTCCCGC                                                         | This work |
| B3                         | TCCAATCCGGACTTAGACGT                                                        | This work |
| FIP                        | CATCCCCACCTTCTCCAGTTTTATCCTTTGTTGCCAGCATG                                   | This work |
| BIP                        | CATGGCCCTTACGAGTAGGGCCCCCTTGCAGGTTTGCC                                      | This work |
| LF                         | GCAGTCTCCTTTGAGTTCCCA                                                       | This work |
| LB                         | TACACACGTGCTACAATGGCg                                                       | This work |
| LB_Medc <sub>1</sub>       | <u>GGTCGTAGAGCCCAGAACGAGATGAGTGGTACACACGTgcTACAATGGCg</u>                   | This work |
| Med <sub>1</sub>           | <b>CCACTCATCTCGTTCTGGGCTCTACGACC</b>                                        | This work |
| UR <sub>1</sub>            | BMN-Q-535-ATTGCGGGAGATGAGACCCGCAA-dTFAM-<br>TGTTGGTCTAGAGCCCAGAACGA-C3      | (2,6)     |
| <i>Treponema pallidum</i>  |                                                                             |           |
| F3                         | GATTGGTCTAAGACGGC                                                           | This work |
| B3                         | GGAATACAACAGGAATCTTCGA                                                      | This work |
| FIP                        | CAGCGCTTCTTTAAGGAATAGGTATGCACATCTTCTCCACTG                                  | This work |
| BIP                        | TGTGGGAAGAAAAGATGCATTTTTTAAAAAACACATGGTACATCGT                              | This work |
| LF                         | CGATAAATACCATCAAGTGTGCCA                                                    | This work |
| LB                         | CGTTCACTCATTGAGTTGCGTG                                                      | This work |
| LF_Medc <sub>2</sub>       | <u>CACTGACCGAACTGAGCTCCTGAGGCATGGTTTTTCGATAAATACCATCAAGTGTGCCA</u>          | This work |
| Med <sub>2</sub>           | <b>CCATGCCTCAGGAGCTCAGTTCGGTCAGTG</b>                                       | (2)       |
| UR <sub>2</sub>            | BMN-Q-535-CACCGGCCAAGACGCGCCGG-dT-Atto-647N-<br>GTGTTCACTGACCGAACTGGAGCA-C3 | (2,6)     |

\*Underlined sequences illustrate complementary regions between LF/LB\_Medc and mediator (Med). Bold text indicates nucleotides in complementary regions of mediator and universal reporters. Indices 1 and 2 indicate complementary sequences in Med and Medc or UR. BIP, backward inner primer; FIP, forward inner primer; LB, Loop B; LF, Loop F; UR, universal reporter.

**Appendix Table 2.** Positive results for *Treponema pallidum* and *Haemophilus ducreyi* in 3 TPHD-LAMP assays before primer titration\*

| <i>T. pallidum</i> , concentration | <i>H. ducreyi</i> , concentration | No. <i>H. ducreyi</i> -positive | No. <i>T. pallidum</i> -positive |
|------------------------------------|-----------------------------------|---------------------------------|----------------------------------|
| 3×10 <sup>3</sup> copies/reaction  | 3×10 <sup>5</sup> copies/reaction | 3                               | 0                                |
| 3×10 <sup>5</sup> copies/reaction  | 3×10 <sup>5</sup> copies/reaction | 3                               | 3                                |
| 3×10 <sup>5</sup> copies/reaction  | 3×10 <sup>3</sup> copies/reaction | 3                               | 3                                |
| 3×10 <sup>3</sup> copies/reaction  | 3×10 <sup>3</sup> copies/reaction | 3                               | 3                                |
| 3×10 <sup>4</sup> copies/reaction  | 3×10 <sup>4</sup> copies/reaction | 3                               | 3                                |
| 0                                  | 0                                 | 0                               | 0                                |

\*Positive results reflect number of positive results in 3 reactions at each combined concentration of *Treponema pallidum* and *Haemophilus ducreyi* loop-mediated isothermal amplification (LAMP).

**Appendix Table 3.** Primer composition for the biplex loop-mediated isothermal amplification of *Treponema pallidum* and *Haemophilus ducreyi* for the clinical validation.

| Target               | Oligonucleotide      | Concentration, μmol/L |
|----------------------|----------------------|-----------------------|
| <i>H. ducreyi</i>    | F3                   | 0.20                  |
|                      | B3                   | 0.20                  |
|                      | FIP                  | 1.60                  |
|                      | BIP                  | 1.60                  |
|                      | LF                   | 0.80                  |
|                      | LB                   | 0.60                  |
|                      | LB_Medc <sub>1</sub> | 0.20                  |
| <i>T. pallidum</i>   | Med <sub>1</sub>     | 0.10                  |
|                      | F3                   | 0.25                  |
|                      | B3                   | 0.25                  |
|                      | FIP                  | 2.00                  |
|                      | BIP                  | 2.00                  |
|                      | LF                   | 0.75                  |
|                      | LB                   | 1.00                  |
| LF_Medc <sub>2</sub> | 0.25                 |                       |
| Med <sub>2</sub>     | 0.13                 |                       |

**Appendix Table 4.** Ortholog sequence data of the *Haemophilus* 16S rRNA gene retrieved from GenBank and used for the *H. ducreyi* TaqMan qPCR design

| GenBank accession no. | Pathogen                               | Strain no.           |
|-----------------------|----------------------------------------|----------------------|
| DQ851143_1            | <i>Haemophilus simiae</i>              | ROG53                |
| AF224307_1            | <i>Haemophilus quentini</i>            | NA                   |
| CP008740_1            | <i>Haemophilus influenzae</i>          | 2019                 |
| CP008740_1_2          | <i>Haemophilus influenzae</i>          | 2019                 |
| AY613457_1            | <i>Haemophilus influenzae</i>          | M8943                |
| AY613451_1            | <i>Haemophilus influenzae</i>          | M9741                |
| CP007470_1_6          | <i>Haemophilus influenzae</i>          | 477                  |
| CP007470_1_5          | <i>Haemophilus influenzae</i>          | 477                  |
| CP007470_1_4          | <i>Haemophilus influenzae</i>          | 477                  |
| CP007470_1_3          | <i>Haemophilus influenzae</i>          | 477                  |
| CP007470_1            | <i>Haemophilus influenzae</i>          | 477                  |
| CP007470_1_2          | <i>Haemophilus influenzae</i>          | 477                  |
| EF399173_1            | <i>Unclutred bacterium</i>             | SJTU_F_12_59         |
| AB597550_1            | <i>Unclutred gamma proteobacterium</i> | NA                   |
| AB597543_1            | <i>Unclutred gamma proteobacterium</i> | NA                   |
| AB597538_1            | <i>Unclutred gamma proteobacterium</i> | NA                   |
| FQ312002_1_6          | <i>Haemophilus parainfluenza</i>       | T3T1                 |
| FQ312002_1_2          | <i>Haemophilus parainfluenza</i>       | T3T1                 |
| FQ312002_1            | <i>Haemophilus parainfluenza</i>       | T3T1                 |
| FQ312002_1_5          | <i>Haemophilus parainfluenza</i>       | T3T1                 |
| CP006956_1            | <i>Bibersteinia trehalosi</i>          | USDA-ARS-USMARC-190  |
| CP006956_1_2          | <i>Bibersteinia trehalosi</i>          | USDA-ARS-USMARC-190  |
| CP006956_1_6          | <i>Bibersteinia trehalosi</i>          | USDA-ARS-USMARC-190  |
| CP006955_1_4          | <i>Bibersteinia trehalosi</i>          | USDA-ARS-USMARC-189  |
| CP003745_1_3          | <i>Bibersteinia trehalosi</i>          | USDA-ARS-USMARC-192  |
| CP006955_1_2          | <i>Bibersteinia trehalosi</i>          | USDA-ARS-USMARC-189  |
| CP006955_1            | <i>Bibersteinia trehalosi</i>          | USDA-ARS-USMARC-189  |
| CP003745_1            | <i>Bibersteinia trehalosi</i>          | USDA-ARS-USMARC-192  |
| CP006944_1            | <i>Mannheimia varigena</i>             | USDA-ARS-USMARC-1312 |
| CP006944_1_5          | <i>Mannheimia varigena</i>             | USDA-ARS-USMARC-1312 |
| CP006953_1_3          | <i>Mannheimia varigena</i>             | USDA-ARS-USMARC-1388 |
| CP006953_1            | <i>Mannheimia varigena</i>             | USDA-ARS-USMARC-1388 |
| CP006943_1_2          | <i>Mannheimia varigena</i>             | USDA-ARS-USMARC-1296 |
| CP006943_1_5          | <i>Mannheimia varigena</i>             | USDA-ARS-USMARC-1296 |
| CP006943_1_6          | <i>Mannheimia varigena</i>             | USDA-ARS-USMARC-1296 |
| CP006943_1_3          | <i>Mannheimia varigena</i>             | USDA-ARS-USMARC-1296 |
| LN795822_1            | <i>Mannheimia sp.</i>                  | MG13                 |
| AF053895_1            | <i>Mannheimia sp.</i>                  | HPA102               |
| AF053890_1            | <i>Mannheimia glucosida</i>            | UT18                 |
| KU051693.1            | <i>Mannheimia haemolytica</i>          | A2                   |
| CP011099_1_6          | <i>Mannheimia haemolytica</i>          | 89010807N            |
| CP004753_2_6          | <i>Mannheimia haemolytica</i>          | USDA-ARS-USMARC-185  |
| CP005972_1_6          | <i>Mannheimia haemolytica</i>          | D153                 |
| CP023044_1_4          | <i>Mannheimia haemolytica</i>          | 191                  |
| CP006574_1_4          | <i>Mannheimia haemolytica</i>          | D174                 |
| CP023043_1_2          | <i>Mannheimia haemolytica</i>          | 193                  |
| CP005972_1            | <i>Mannheimia haemolytica</i>          | D153                 |
| DQ301920_1            | <i>Mannheimia haemolytica</i>          | PHL213               |
| CP005383_1_6          | <i>Mannheimia haemolytica</i>          | M42548               |
| CP006957_2_6          | <i>Mannheimia haemolytica</i>          | USDA-ARS-USMARC-184  |
| CP006957_2_4          | <i>Mannheimia haemolytica</i>          | USDA-ARS-USMARC-184  |
| CP006957_2_2          | <i>Mannheimia haemolytica</i>          | USDA-ARS-USMARC-184  |
| GQ358868_1            | <i>Uncultured bacterium</i>            | clone 8837-D0-O-7D   |
| M75079_1              | <i>Haemophilus ducreyi</i>             | 35000                |
| M75084_1              | <i>Haemophilus ducreyi</i>             | KC57                 |
| M75078_1              | <i>Haemophilus ducreyi</i>             | CPI 542              |
| CP015434_1_5          | <i>Haemophilus ducreyi</i>             | GHA9                 |
| CP015434_1            | <i>Haemophilus ducreyi</i>             | GHA9                 |
| AE017143_1_2          | <i>Haemophilus ducreyi</i>             | 35000                |
| ST16SrRNA_3_1490596   | <i>Haemophilus ducreyi</i>             | 1490596              |
| AF525028_1            | <i>Haemophilus ducreyi</i>             | isolate Amsterdam    |
| CP015432_1            | <i>Haemophilus ducreyi</i>             | GHA5                 |
| CP015426_1_2          | <i>Haemophilus ducreyi</i>             | VAN3                 |
| NR_044741_1           | <i>Haemophilus ducreyi</i>             | CIP 54.2             |
| CP015425_1_2          | <i>Haemophilus ducreyi</i>             | VAN2                 |
| NZ_CP015429           | <i>Haemophilus ducreyi</i>             | GHA1                 |
| CP015430_1_5          | <i>Haemophilus ducreyi</i>             | GHA2                 |



| GenBank accession no. | Pathogen                                                | Strain no.            |
|-----------------------|---------------------------------------------------------|-----------------------|
| CP015430_1_6          | <i>Haemophilus ducreyi</i>                              | GHA2                  |
| CP015430_1            | <i>Haemophilus ducreyi</i>                              | GHA2                  |
| AY513483_1            | <i>Haemophilus ducreyi</i>                              | ATCC 33921            |
| HE681373_1            | Uncultured bacterium                                    | clone 7q_13           |
| AY005034_1            | <i>Haemophilus</i> sp.                                  | clone BJ021           |
| AF224283_1            | <i>Actinobacillus pleuropneumoniae</i>                  | MCCM 00189            |
| LK985384_1            | <i>Haemophilus parahaemolyticus</i>                     | isolate G321          |
| AF224285_1            | <i>Actinobacillus capsulatus</i>                        | CCUG 37035            |
| CP009158_1_6          | <i>Haemophilus parasuis</i>                             | SH03                  |
| CP005384_1            | <i>Haemophilus parasuis</i>                             | ZJ0906                |
| CP001321_1            | <i>Haemophilus parasuis</i>                             | SH0165                |
| CP001321_1_6          | <i>Haemophilus parasuis</i>                             | SH0165                |
| CP001321_1_4          | <i>Haemophilus parasuis</i>                             | SH0165                |
| CP001321_1_5          | <i>Haemophilus parasuis</i>                             | SH0165                |
| CP001321_1_3          | <i>Haemophilus parasuis</i>                             | SH0165                |
| CP005384_1_3          | <i>Haemophilus parasuis</i>                             | ZJ0906                |
| CP005384_1_4          | <i>Haemophilus parasuis</i>                             | ZJ0906                |
| CP005384_1_5          | <i>Haemophilus parasuis</i>                             | ZJ0906                |
| CP020085_1_5          | <i>Haemophilus parasuis</i>                             | CL120103              |
| CP015099_1_5          | <i>Haemophilus parasuis</i>                             | SC1401                |
| CP020085_1_6          | <i>Haemophilus parasuis</i>                             | CL120103              |
| CP015099_1_2          | <i>Haemophilus parasuis</i>                             | SC1401                |
| CP015099_1            | <i>Haemophilus parasuis</i>                             | SC1401                |
| CP020085_1_4          | <i>Haemophilus parasuis</i>                             | CL120103              |
| CP020085_1            | <i>Haemophilus parasuis</i>                             | CL120103              |
| AB559648_1            | Uncultured bacterium                                    | clone c_GA_H2         |
| AF371853_1            | Uncultured bacterium                                    | clone bp-2130-s959-2  |
| DQ926692_1            | <i>Actinobacillus porciconsillarum</i>                  | 73706                 |
| DQ926691_1            | <i>Actinobacillus porciconsillarum</i>                  | 71123                 |
| DQ381154_1            | <i>Pasteurella caballi</i>                              | NSVL 84679            |
| AF224291_1            | <i>Pasteurella caballi</i>                              | MCCM 00841            |
| HF565184_1            | <i>Actinobacillus</i> sp.                               | MK-2012               |
| HF565188_1            | <i>Actinobacillus</i> sp.                               | MK-2012               |
| HF565186_1            | <i>Actinobacillus</i> sp.                               | MK-2012               |
| KC834743_1            | <i>Actinobacillus pleuropneumoniae</i>                  | TJ12                  |
| KC834744_1            | <i>Actinobacillus pleuropneumoniae</i>                  | HB13                  |
| NR_115546_2           | <i>Actinobacillus pleuropneumoniae</i>                  | Shope 4074            |
| D30030_1              | <i>Actinobacillus pleuropneumoniae</i>                  | NA                    |
| CP022715_1_2          | <i>Actinobacillus pleuropneumoniae</i>                  | KL 16                 |
| CP022715_1_4          | <i>Actinobacillus pleuropneumoniae</i>                  | KL 16                 |
| CP000569_1_3          | <i>Actinobacillus pleuropneumoniae</i>                  | L20 serotype 5b       |
| CP000569_1_2          | <i>Actinobacillus pleuropneumoniae</i>                  | L20 serotype 5b       |
| CP000569_1            | <i>Actinobacillus pleuropneumoniae</i>                  | L20 serotype 5b       |
| CP001091_1_6          | <i>Actinobacillus pleuropneumoniae</i>                  | serotype 7, str. AP76 |
| CP000687_1_6          | <i>Actinobacillus pleuropneumoniae</i>                  | serotype 3, str. JL03 |
| CP000687_1_5          | <i>Actinobacillus pleuropneumoniae</i>                  | serotype 3, str. JL03 |
| CP001091_1_4          | <i>Actinobacillus pleuropneumoniae</i>                  | serotype 7, str. AP76 |
| D30032_1              | <i>Actinobacillus pleuropneumoniae</i>                  | NA                    |
| D30031_1              | <i>Actinobacillus pleuropneumoniae</i>                  | NA                    |
| AY749139_1            | <i>Actinobacillus genomu</i> sp.                        | 52418-03              |
| AY749138_1            | <i>Actinobacillus genomu</i> sp.                        | 52418-03              |
| AF247722_1            | <i>Actinobacillus lignieresii</i>                       | F 127                 |
| AY749137_1            | <i>Actinobacillus genomu</i> sp.                        | 24593-01              |
| AF247723_1            | <i>Actinobacillus lignieresii</i>                       | F 264                 |
| CP003875_1_6          | <i>Actinobacillus suis</i>                              | H91-0380              |
| LT906456_1            | <i>Actinobacillus suis</i>                              | NCTC12996             |
| LT906456_1_3          | <i>Actinobacillus suis</i>                              | NCTC12996             |
| CP009159_1_6          | <i>Actinobacillus suis</i>                              | ATCC 33415            |
| CP007715_1_4          | <i>Actinobacillus equuli</i> subsp. <i>equuli</i>       | 19392                 |
| CP007715_1_3          | <i>Actinobacillus equuli</i> subsp. <i>equuli</i>       | 19392                 |
| AY749144_1            | <i>Actinobacillus equuli</i> subsp. <i>haemolyticus</i> | 27368-01              |
| AY749142_1            | <i>Actinobacillus equuli</i> subsp. <i>haemolyticus</i> | 23611-01              |
| AY749141_1            | <i>Actinobacillus equuli</i> subsp. <i>haemolyticus</i> | 23596-01              |
| CP007715_1_2          | <i>Actinobacillus equuli</i> subsp. <i>equuli</i>       | 19392                 |
| AY749140_1            | <i>Actinobacillus equuli</i> subsp. <i>haemolyticus</i> | 23337-01              |

**Appendix Table 5.** Sensitivity and specificity of bplex loop-mediated isothermal amplification of *Treponema pallidum* and *Haemophilus ducreyi* in samples from 293 patients with suspected *T. pallidum* infection

| Characteristics              | Sample size, no. | <i>Treponema pallidum</i> , no. | <i>Haemophilus ducreyi</i> , no. |
|------------------------------|------------------|---------------------------------|----------------------------------|
| All samples                  | 293              |                                 |                                  |
| True positive                |                  | 50                              | 142                              |
| True negative                |                  | 224                             | 116                              |
| False positive               |                  | 10                              | 21                               |
| False negative               |                  | 9                               | 13                               |
| Positive predictive value, % |                  | 83.3                            | 87.1                             |
| Negative predictive value, % |                  | 96.1                            | 89.9                             |
| Lihir Island                 | 57               |                                 |                                  |
| True positive                |                  | 19                              | 13                               |
| True negative                |                  | 34                              | 39                               |
| False positive               |                  | 2                               | 0                                |
| False negative               |                  | 2                               | 4                                |
| Positive predictive value, % |                  | 90.5                            | 100                              |
| Negative predictive value, % |                  | 94.4                            | 90.7                             |
| Karkar Island                | 184              |                                 |                                  |
| True positive                |                  | 25                              | 99                               |
| True negative                |                  | 144                             | 59                               |
| False positive               |                  | 8                               | 20                               |
| False negative               |                  | 7                               | 6                                |
| Positive predictive value, % |                  | 75.8                            | 83.2                             |
| Negative predictive value, % |                  | 95.4                            | 90.8                             |
| Ghana                        | 52               |                                 |                                  |
| True positive                |                  | 6                               | 30                               |
| True negative                |                  | 46                              | 18                               |
| False positive               |                  | 0                               | 1                                |
| False negative               |                  | 0                               | 3                                |
| Positive predictive value, % |                  | 100                             | 96.8                             |
| Negative predictive value, % |                  | 100                             | 85.7                             |

**Appendix Table 6.** Sensitivity and specificity of singleplex loop-mediated isothermal amplification for *Treponema pallidum* and *Haemophilus ducreyi* in samples from 293 patients with suspected *T. pallidum* infection

| Results                      | <i>Treponema pallidum</i> , no. | <i>Haemophilus ducreyi</i> , no. |
|------------------------------|---------------------------------|----------------------------------|
| True positive                | 46                              | 141                              |
| True negative                | 229                             | 103                              |
| False positive               | 5                               | 34                               |
| False negative               | 13                              | 14                               |
| Positive predictive value, % | 90.2                            | 80.6                             |
| Negative predictive value, % | 94.6                            | 88.0                             |

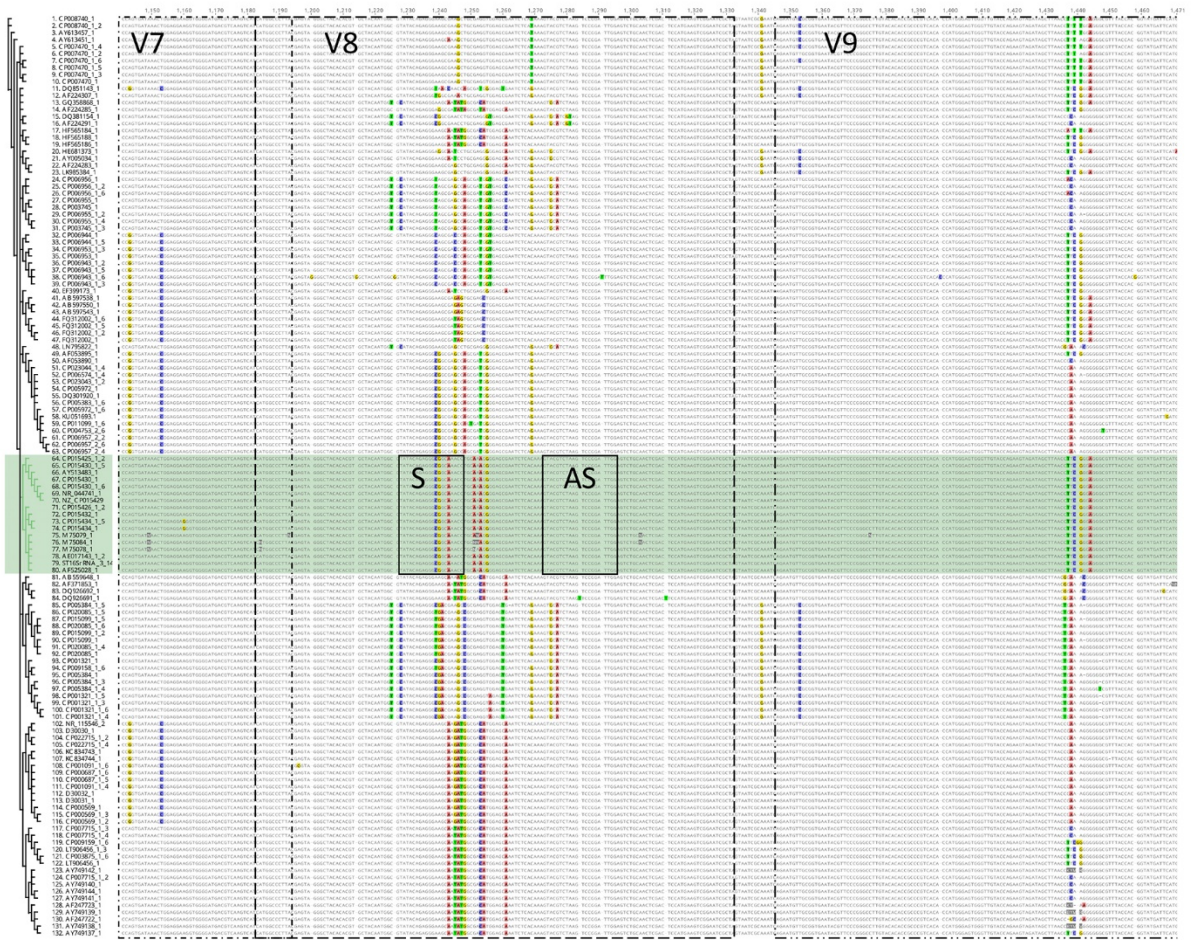

**Appendix Figure 1.** Nucleotide sequence identity chart for variable regions 7–9 and dendrogram for variable regions 1–9 of orthologue sequence data of the 16S rRNA gene of *Haemophilus ducreyi*. Sequence differences are highlighted. The region inside the dotted line V7 represents variable region 7, the region inside dotted line V8 represents variable region 8, and the region inside dotted line V9 represents the variable region 9 of the 16S rRNA gene. Sequences in green band denote *H. ducreyi* specific sequences. The S-box indicates the binding region of sense primer and the AS-box indicates the binding region of the antisense primer for the optimized qPCR for *H. ducreyi*. Sequences were aligned using Geneious (<https://www.geneious.com>). GenBank accession numbers correspond to the data shown in Appendix Table 4.

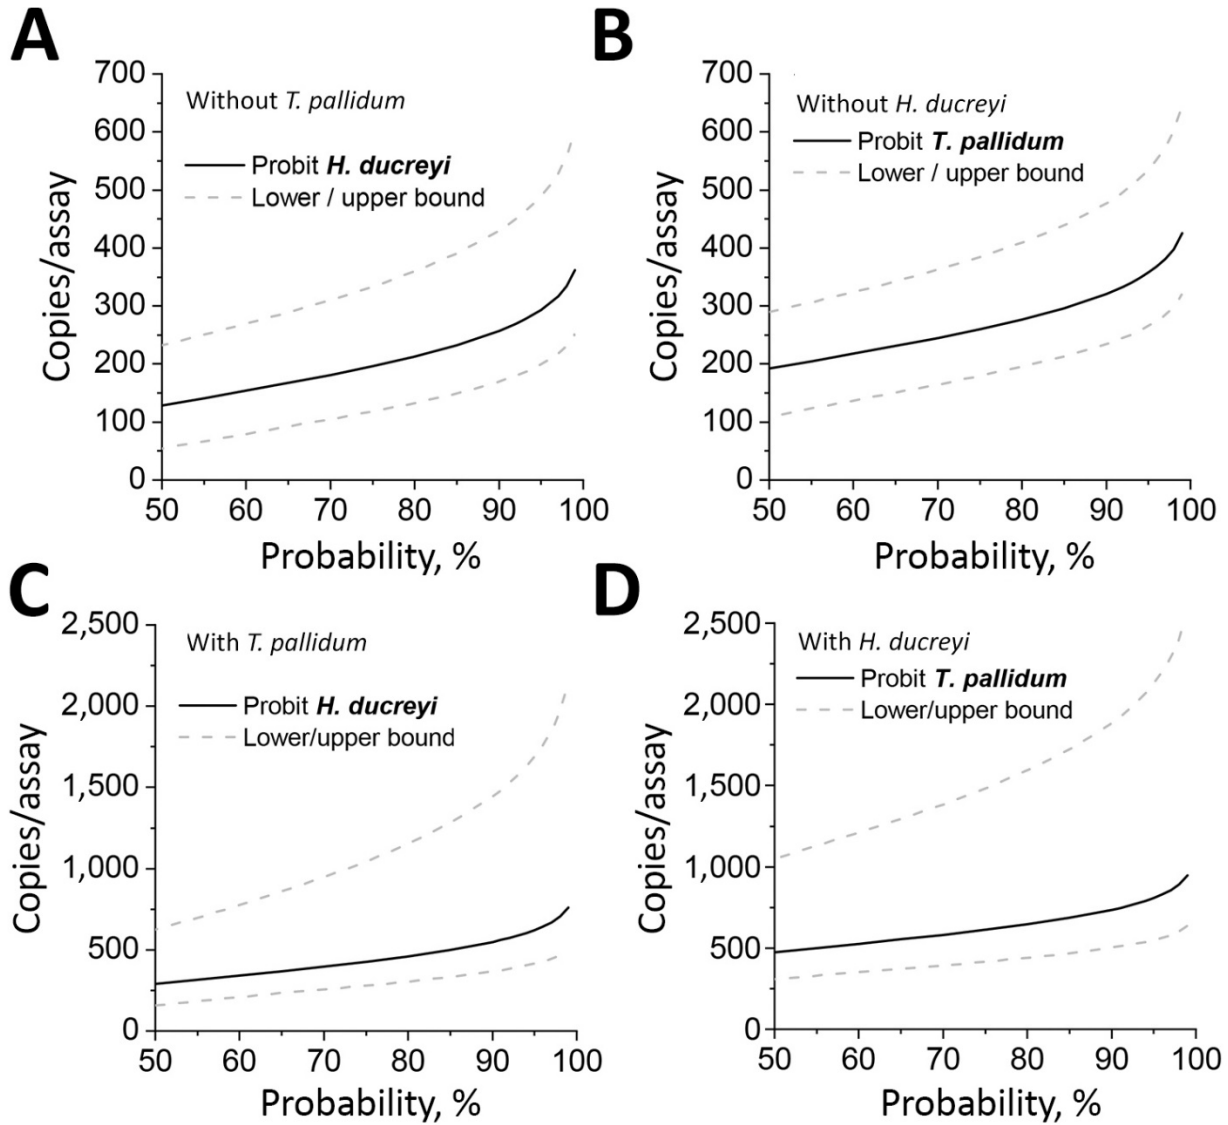

**Appendix Figure 2.** Limit of detection (LOD) for *Treponema pallidum* and *Haemophilus ducreyi* loop-mediated isothermal amplification (TPHD-LAMP) assay. The probability of successful amplification of a given copy number was predicted using Probit analysis. Lower and upper bounds, illustrated as dashed lines, represent 95% CI. A) LOD for *H. ducreyi* in samples without *T. pallidum*. B) LOD for *T. pallidum* in samples without *H. ducreyi*. C) LOD for *H. ducreyi* in the presence of  $3 \times 10^5$  copies *T. pallidum* plasmid DNA. D) LOD for *T. pallidum* in the presence of  $3 \times 10^5$  copies *H. ducreyi* plasmid DNA.

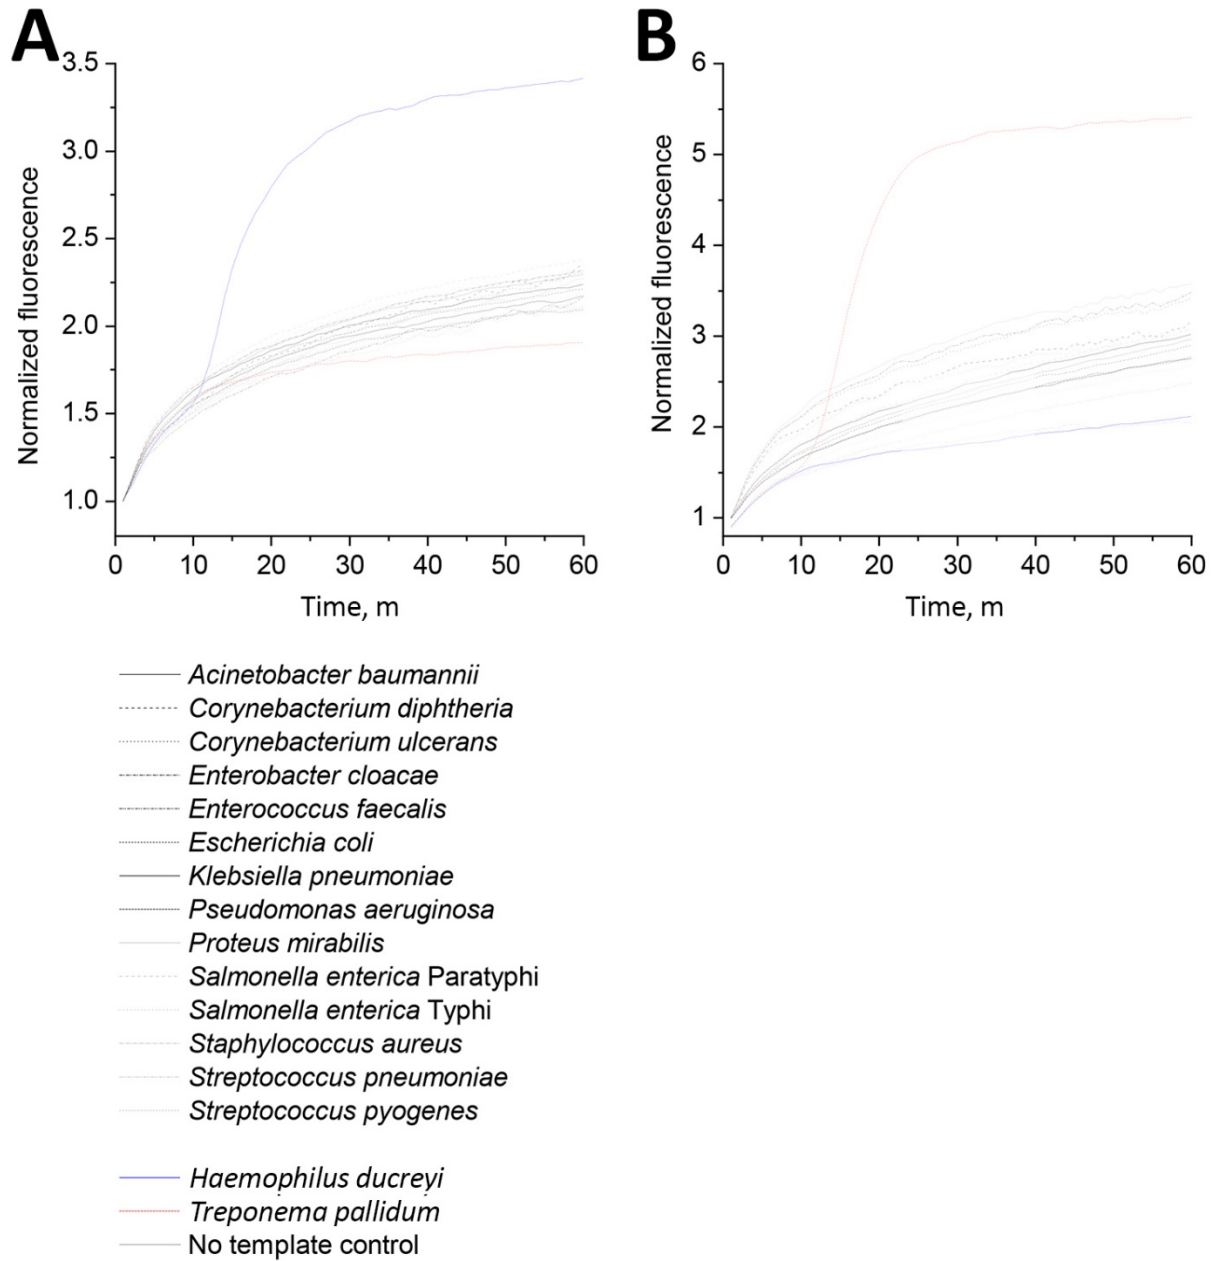

**Appendix Figure 3.** Analytical specificity of *Treponema pallidum* and *Haemophilus ducreyi* loop-mediated isothermal amplification (TPHD-LAMP) assay against pathogens other than *T. pallidum* and *H. ducreyi*. Specificity of TPHD-LAMP for A) *H. ducreyi* in mixed samples; B) *T. pallidum* in mixed samples.

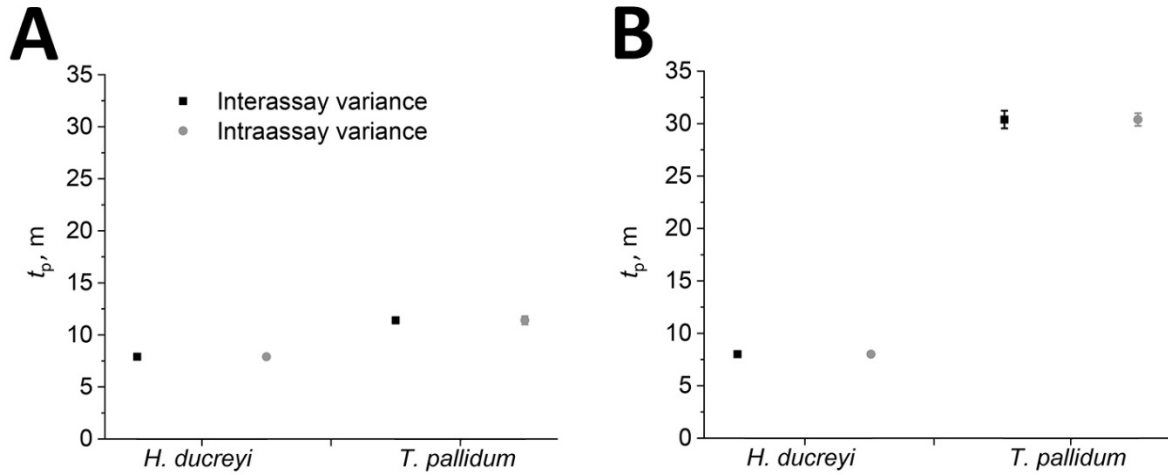

**Appendix Figure 4.** Interassay and intraassay variance of *Treponema pallidum* and *Haemophilus ducreyi* loop-mediated isothermal amplification (TPHD-LAMP) assay illustrated for the amplification of 1 target and of both targets in the sample. The mean value of time to positive ( $t_p$ ) is plotted against target and type of variability. The variability is illustrated by error bars, which reflect SD values. A) Variance in the presence of  $3 \times 10^4$  copies/reaction of 1 target, either *T. pallidum* or *H. ducreyi* in the sample. B) Variance in the presence of  $3 \times 10^4$  copies/reaction of *T. pallidum* and  $3 \times 10^4$  copies/reaction *H. ducreyi* in the sample.
